# Supplementary material
Source: PubMed Central journal article supplement (PMC2845417)
Supplement: tpc.109.072777_1.pdf [file tpc.109.072777_1.pdf]

**Supplemental Table 1. Gene names and IDs used for the Phylogenetic analysis**

**SPCHMUTEFAMA tree**

|          | <b>gene name ID</b>        |
|----------|----------------------------|
| At SPCH  | At5g53210                  |
| At MUTE  | At3g06120                  |
| At FAMA  | At3g24140                  |
| Pt SPCH1 | fgenesh4_pm.C_LG_XII000063 |
| Pt SPCH2 | gw1.197.14.1               |
| Os SPCH1 | Os06g33450                 |
| Os SPCH2 | Os02g15760                 |
| Pt MUTE  | gw1.VIII.81.1              |
| Os MUTE  | Os05g51820                 |
| Pt FAMA1 | gw1.I.3509.1               |
| Pt FAMA2 | gw1.XVII.460.1             |
| Os FAMA  | Os05g50900                 |
| Pp FAMA1 | estExt_gwp_gw1.C_710125    |
| Pp FAMA2 | e_gw1.519.9.1              |
| outgroup | At4g01460                  |
| outgroup | At5g46690                  |

**TMM tree**

|             | <b>gene name ID</b> |
|-------------|---------------------|
| At TMM      | At1g80080           |
| Pt TMM      | eugene3.00970008    |
| Os TMM      | Os01g43440          |
| Pp TMM      | gw1.1.550.1         |
| At outgroup | At2g42800           |
| Pt outgroup | gw1.77.132.1        |
| Os outgroup | Os01g52880          |
| Os outgroup | Os05g45430          |
| At outgroup | At4g28560           |
| Pt outgroup | gw1.V.1354.1        |
| Os outgroup | Os06g42220          |
| Pt outgroup | gw1.VIII.2940.1     |
| Os outgroup | Os01g02060          |
| Pp outgroup | gw1.49.40.1         |
| Pp outgroup | gw1.387.50.1        |
| Pp outgroup | gw1.184.16.1        |

**YODA N term regulatory region**

|                               | <b>gene name ID</b>            |
|-------------------------------|--------------------------------|
| At YODA                       | At1g63700                      |
| Pt YODA1                      | estExt_Genewise1_v1.C_LG_I8903 |
| Pt YODA2                      | FGENESH4_PM.C_LG_III000419     |
| Os YODA1                      | Os04g47240                     |
| Os YODA2                      | Os02g44642                     |
| Pp YODA                       | gw1.44.79.1                    |
| At YODA outgroup (supplement) | At1g53570                      |
| At YODA outgroup (supplement) | At5g66850                      |
| At YODA outgroup (supplement) | At1g09000                      |
| At YODA outgroup (supplement) | At1g54960                      |
| At YODA outgroup (supplement) | At3g06030                      |

**genome sources**

|                            |             |
|----------------------------|-------------|
| Populus trichocarpa v1.1   | Poplar      |
| TAIR                       | Arabidopsis |
| GRAMENE                    | Rice        |
| Physcomitrella patens v1.1 | Moss        |

## Supplemental Methods

### Bioinformatic/Phylogenetic Methods

BLAST searches using Arabidopsis amino acid sequences were performed using GRAMENE, Populus trichocarpa v1.1, Physcomitrella patens v1.1 genome websites to identify putative orthologs for SPCH, MUTE, FAMA, TMM, and YODA. All high scoring matching genes were used in initial phylogenetic analyses to identify true orthologs. Non-orthologous genes were then discarded, and the dataset was realigned and analyzed as described below. Outgroup sequences used for the analyses were identified in previously published comprehensive analyses of Arabidopsis bHLH and receptor like protein gene families (Toledo-Ortiz, 2003; Wang et al. 2008). Identification of the putative N terminal regulatory region of *Physcomitrella patens* YODA, was first identified using BLAST searches, and then additional unannotated sequence were found by identifying open reading frames towards the N terminal end.

Amino acid sequences for the bHLH and ACT domains from SPCH, MUTE, FAMA, and their orthologs were aligned with CLUSTAL X (Jeanmougin et al., 1998). The full-length amino acid sequences from TMM and its orthologs were also aligned with CLUSTAL X. Default CLUSTAL X alignment parameters were used, which include pairwise alignment gap opening penalty of 10 and extension of 0.1, multiple alignment gap opening penalty of 10 and extension of 0.2, and a gonnet series matrix. Neighbor-joining trees were constructed using Phylip 3.68 (Felsenstein, 2005) (Dayhoff PAM matrix) and nodal support was assessed using 100,000 bootstrap replicates. Tree topologies were also computed using Bayesian methods (MrBayes 3.1.2) (Ronquist and Huelsenbeck, 2003) based on a mixed model of amino acid substitution and also

allowed for invariant sites and rate heterogeneity using the gamma distribution. For the TMM tree, the analysis was run for 435,500 generations in 2 separate analyses, and the first 1000 generations were discarded as burnin. The SPCH, MUTE, FAMA analysis was run for 1,000,000 generations in 2 separate analyses and the first 600 generations were discarded as burnin. To ensure adequate mixing had occurred in the Bayesian analyses, each of the 2 separate analyses were analyzed separately to compare clade recovery and posterior probability support values. For both the TMM, and SPCH, MUTE, and FAMA analyses, independent run tree topologies were identical, and posterior probability values varied by no more than 2%. Trees shown in Figure 6 are of the two separate runs combined.

### **Supplemental References**

- Felsenstein, J.** (2005). PHYLIP (Phylogeny Inference Package) (Department of Genome Sciences, University of Washington, Seattle: Distributed by the author).
- Jeanmougin, F., Thompson, J.D., Gouy, M., Higgins, D.G., and Gibson, T.J.** (1998). Multiple sequence alignment with Clustal X. *Trends in Biochemical Sciences* **23**, 403–405.
- Ronquist, F., and Huelsenbeck, J.P.** (2003). MRBAYES 3: Bayesian phylogenetic inference under mixed models. *Bioinformatics* **19**, 1572- 1574.
- Ichimura, K., Shinozaki, K., Tena, G., Sheen, J., Henry, Y., Champion, A., Kreis, M., Zhang, S., Hirt, H., Wilson, C., Heberle-Bors, E., Ellis, B.E., Morris, P.C., Innes, R.W., Ecker, J.R., Scheel, D., Klessig, D.F., Machida, Y., Mundy, J., Ohashi, Y., and Walker, J.C.** (2002). Mitogen-activated protein kinase cascades in plants: a new nomenclature. *Trends in Plant Science* **7**, 301-308.

**Toledo-Ortiz, G., Huq, E., and Quail, P.H.** (2003). The Arabidopsis Basic/Helix-Loop-Helix Transcription Factor Family. *Plant Cell* **15**, 1749-1770.

**Wang, G., Ellendorff, U., Kemp, B., Mansfield, J.W., Forsyth, A., Mitchell, K., Bastas, K., Liu, C.-M., Woods-Tor, A., Zipfel, C., de Wit, P.J.G.M., Jones, J.D.G., Tor, M., and Thomma, B.P.H.J.** (2008). A Genome-Wide Functional Investigation into the Roles of Receptor-Like Proteins in Arabidopsis. *Plant Physiol.* **147**, 503-517.
